# Supplementary material
Source: PubMed Central journal article supplement (PMC4704229)
Supplement: AAC.00828-15_zac001164675so1.pdf [file AAC.00828-15_zac001164675so1.pdf]

## Supplementary materiel.

**Table S1** Primers used for PCR Mapping

| Primer     | Sequence (5' _3')     | Product length (pb) | position    | Accession number or target | References    |
|------------|-----------------------|---------------------|-------------|----------------------------|---------------|
| MOX2-A_for | ACCCGGACGATATAATCAGC  | 570                 | 32-51       | AJ276453                   | This study    |
| MOX2-A_rev | TCACGATAACTGGTCAGCAA  |                     | 582-601     | AJ276453                   |               |
| MOX2-B_for | AATGTTGCAACGTCATGGAG  | 1640                | 398-417     | AJ276453                   | This study    |
| MOX2-B_rev | AAAGTCGGATACTTCGGACC  |                     | 2018-2037   | AJ276453                   |               |
| MOX2-D_for | CATGATCAAATGCCTTGCCA  | 1828                | 1786-1805   | AJ276453                   | This study    |
| MOX2-D_rev | CAGGCTGAGCGAATTGAAAA  |                     | 3594-3613   | AJ276453                   |               |
| MOX2-E_for | CATCAGAACCCAACAACGTC  | 1340                | 3671-3690   | AJ276453                   | This study    |
| MOX2-E_rev | CCATGGTGATGTGTCAAAG   |                     | 4991-5010   | AJ276453                   |               |
| MOX2-G_for | TGCAACAACGACAATCCATC  | 1461                | 4621-4640   | AJ276453                   | This study    |
| MOX2-G_rev | ACACAGCAGAAACATACCCA  |                     | 6062-6081   | AJ276453                   |               |
| FOX3-H_for | CTCTTCTGAACTCAACCGGA  | 1313                |             | ISApu2                     | This study    |
| FOX3-H_rev | CGTCGTTGTTGCATATGGTTA |                     |             | bla <sub>FOX-3</sub>       |               |
| FOX3-I_for | GAGTGATCGGTCGAGTTCAA  | 577                 |             | bla <sub>FOX-3</sub>       | This study    |
| FOX3-I_rev | GCGAGGCGATGACAAAAAT   |                     |             | mdrL                       |               |
| CMY-A_for  | CGTAGAGGATCTCAGTTCAG  | 3700                | 20-39       | FM256880                   | Verdet, 2009* |
| CMY-A_rev  | CCTGCCACTGTTGCCTGTC   |                     | 2195-2214   | DQ164214                   |               |
| CMY-B_for  | ACACTCACCTCACAAAGCAAC | 2000                | 976-995     | DQ164214                   | Verdet, 2009* |
| CMY-B_rev  | TTGAGCTTTTCAAGAATGCGC |                     | 2968-2990   | DQ164214                   |               |
| CMY-C_for  | GATTCCTTGACTCTTCAGA   | 800                 | 1366-1385   | DQ164214                   | Verdet, 2009* |
| CMY-C_rev  | CCTGCCACTGTTGCCTGTC   |                     | 2195-2214   | DQ164214                   |               |
| CMY-D_for  | ATAAGCGACAGCTTGTGGCA  | 3500                | 336-355     | FM246883                   | Verdet, 2009* |
| CMY-D_rev  | ACAACCTGGAGCACAGAAA   |                     | 3978-3997   | FM246883                   |               |
| CMY-E_for  | TTATGCCACGTGAGCCTTTC  | 2500                | 2415-2434   | FM246883                   | Verdet, 2009* |
| CMY-E_rev  | CCTGCCACTGTTGCCTGTC   |                     | 4922-4941   | FM246883                   |               |
| CMY-F_for  | CTAACCTGTCCGTGTCGAG   | 2400                | 2941-2960   | DQ164214                   | Verdet, 2009* |
| CMY-F_rev  | TTCCAGCGCTATCGCTTAT   |                     | 5379-5398   | DQ164214                   |               |
| CMY-G_for  | CGCCTGCTAAAAGCAAGAAT  | 2700                | 4058-4077   | DQ164214                   | Verdet, 2009* |
| CMY-G_rev  | TGCCATCTGCATGAACAAAT  |                     | 6788-6807   | DQ164214                   |               |
| CMY-H_for  | AAGGCTGTTGGCTTCGAGTA  | 2500                | 6699_6718   | DQ164214                   | Verdet, 2009* |
| CMY-H_rev  | TCAGCAGTATCACCTGCAC   |                     | 9219-9238   | DQ164214                   |               |
| CMY-I_for  | ATGTGTTCAAAGCCGAAACC  | 2500                | 9133-9152   | DQ164214                   | Verdet, 2009* |
| CMY-I_rev  | GGTGCCGTAATCGAAGATTT  |                     | 11673-11692 | DQ164214                   |               |
| CMY-J_for  | TTTTGTATCGCGCTGGAATT  | 1700                | 10193-10212 | DQ164214                   | Verdet, 2009* |
| CMY-J_rev  | ACACTCACCTCACAAAGCAAC |                     | 11933-11952 | DQ164214                   |               |
| CMY-K_for  | TCTTGATTTATTTGTTGAGTC | 2100                | 12519-12540 | DQ164214                   | Verdet, 2009* |
| CMY-K_rev  | TTGAGCTTTTCAAGAATGCGC |                     | 2969-2990   | DQ164214                   |               |
| CMY-L_for  | CGCCTGCTAAAAGCAAGAAT  | 3800                | 6785-6804   | FM246883                   | Verdet, 2009* |
| CMY-L_rev  | CTGAAACAGCAAACCTGCAA  |                     |             |                            |               |

Verdet, C., V. Gautier, E. Chachaty, E. Ronco, N. Hidri, D. Decré, and G. Arlet. 2009. Genetic context of plasmid-carried bla<sub>CMY-2</sub> like genes in *Enterobacteriaceae*. *Antimicrob. Agents Chemother.* 53: 4002-4006.
